# Supplementary material for: Synthesis of a Reactive Oxygen Species-Responsive Doxorubicin Derivative
Source: MDPI journal article supplement (doi:10.3390/molecules23071809), 2018-07-21

## Supplementary Data

### Synthesis of a reactive oxygen species-responsive doxorubicin derivative

James B. Delehanty, Shivani Das, Efram Goldberg, Ajmeeta Sangtani and D. Andrew Knight

Figure S1.  $^1\text{H}$  NMR spectrum of compound **4** 2

Figure S2. ESI and APCI mass spectra for compound **4** 3

**Figure S1.  $^1\text{H}$  NMR spectrum of compound 4 recorded in  $\text{CDCl}_3$ .**

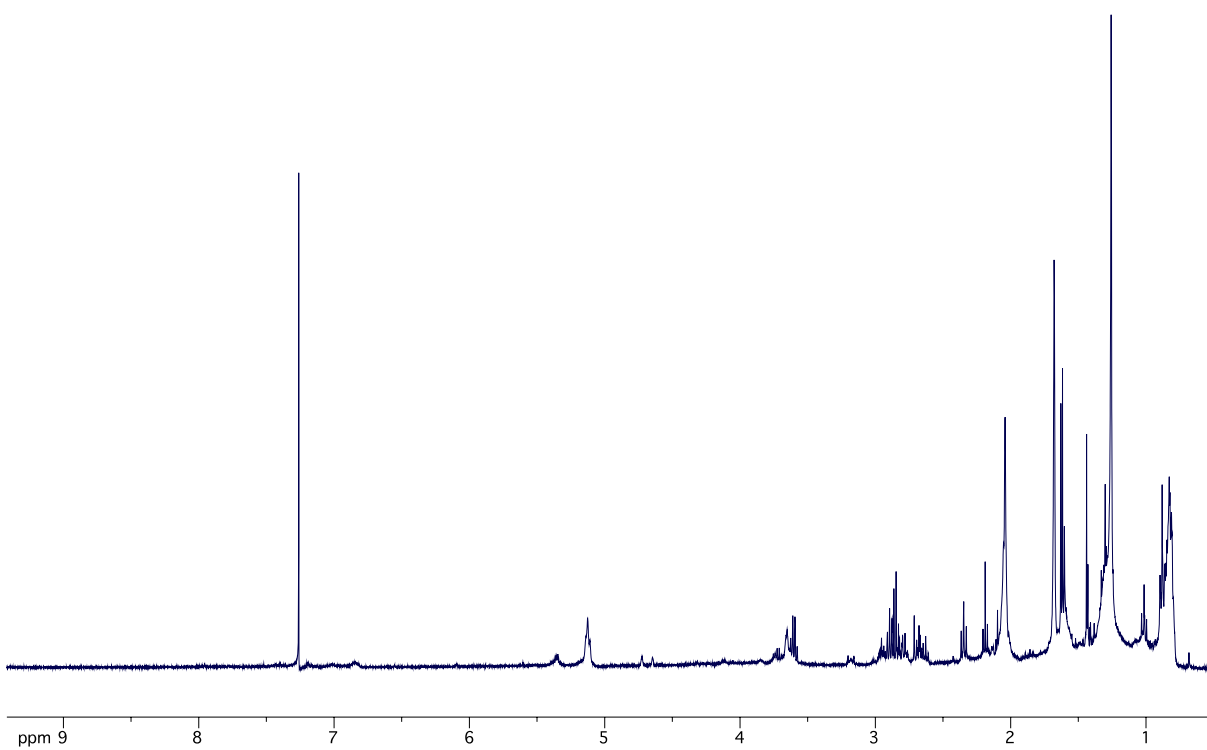

**Figure S2. ESI and APCI mass spectra for compound 4: m/z: 844.22**

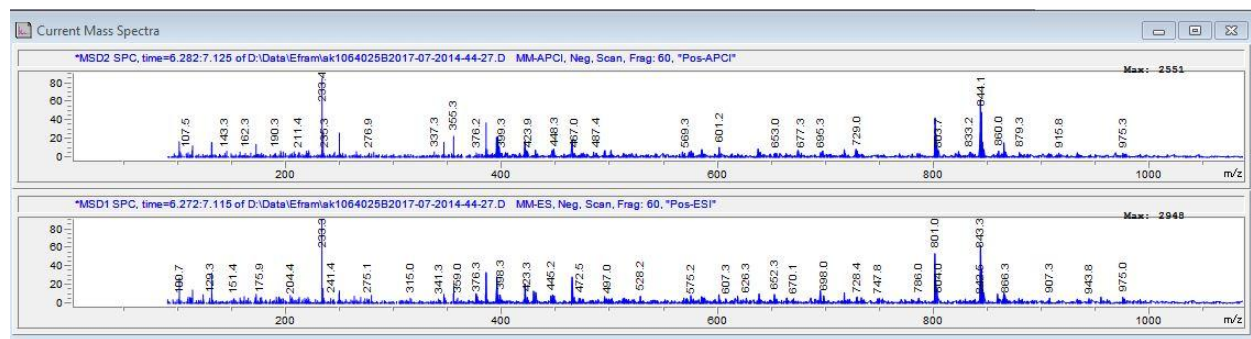

Supplement: s1 [file s1]
